# Supplementary material for: Two superimposed cold and fresh anomalies enhanced Irminger Sea deep convection in 2016–2018
Source: Copernicus journal article supplement (doi:10.5194/os-2019-40), 2019-05-17
Supplement: Supplementary file 1 [file os-2019-40-supplement.pdf]

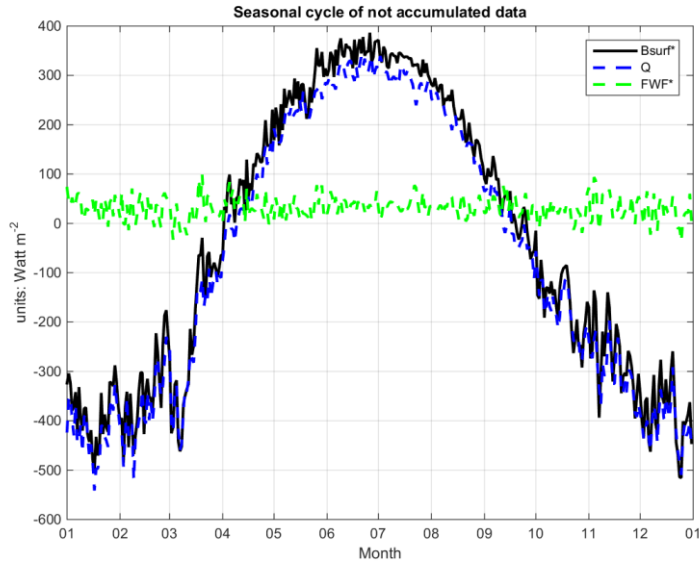

**Figure S1.** Mean (1993 - 2016) seasonal cycle of air-sea flux of buoyancy (Bsurf\*), heat (Q) and freshwater (FWF\*) averaged on the Irminger region (pink box in Fig. 1). Data origin: ERA-Interim, accumulated every 24h.

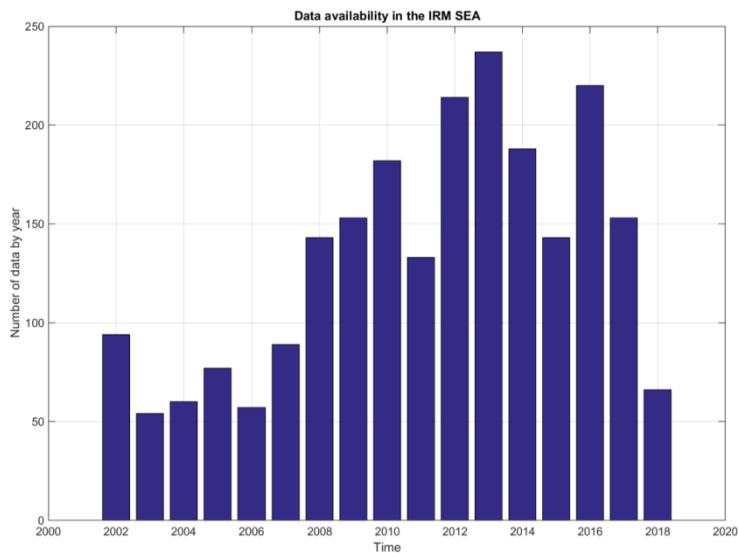

**Figure S2.** Number of Argo profiles by year used in Figure 5.

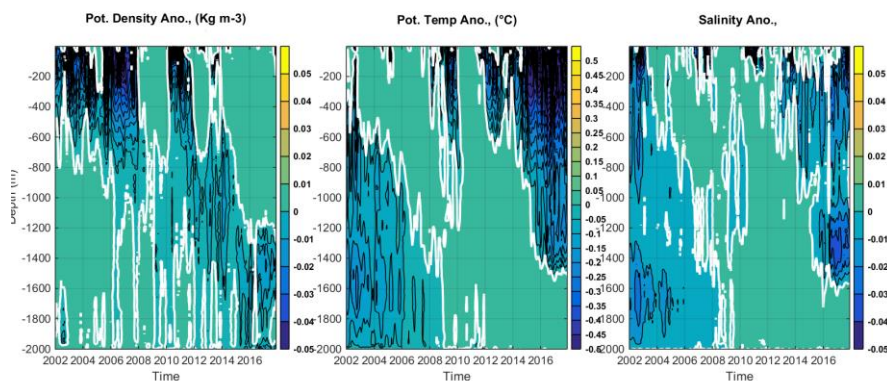

**Figure S3.** Evolution of vertical profiles of monthly anomalies of  $\sigma_0$  (left panel),  $\theta$  (central panel) and  $S$  (right panel), at  $59^\circ\text{N}$ ,  $40^\circ\text{W}$  in the Irminger Sea. The anomalies were estimated from the ISAS database (Gaillard et al., 2016), they were referenced to the monthly mean estimated for the period 2002 – 2016. The white line represents anomaly equal to 0.

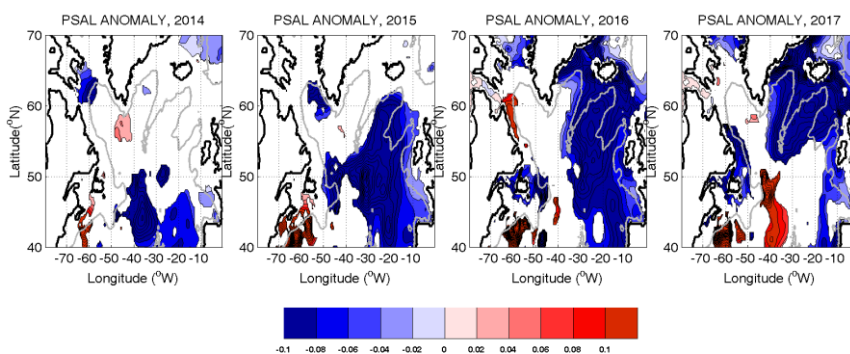

**Figure S4.** Annual anomalies of salinity in the surface layer (20 – 100 m) estimated from ISAS database. Reference period: 2002 – 2016. We represented only anomalies larger than one standard deviation of the mean.
